1  
2  
3  
4  
5  
6  
7 **Human FcRn expression and Type I Interferon signaling control Echovirus 11**  
8 **pathogenesis in mice**  
9

10  
11  
12  
13  
14 Alexandra I. Wells<sup>1,2</sup>, Kalena A. Grimes<sup>1,2</sup>, Kenneth Kim<sup>3,4</sup>, Emilie Branche<sup>4</sup>, Christopher J.  
15 Bakkenist<sup>5,6</sup>, William H. DePas<sup>1,2</sup>, Sujan Shresta<sup>4</sup>, and Carolyn B. Coyne<sup>1,2\*</sup>  
16  
17  
18

19 <sup>1</sup>Department of Pediatrics, University of Pittsburgh School of Medicine, Pittsburgh, PA USA,  
20 <sup>2</sup>Center for Microbial Pathogenesis, UPMC Children's Hospital of Pittsburgh, Pittsburgh, PA  
21 USA, <sup>3</sup>Kord Animal Health Diagnostic Laboratory, Nashville, TN USA, <sup>4</sup>Center for Infectious  
22 Disease and Vaccine Research, La Jolla Institute for Immunology La Jolla, CA USA,  
23 <sup>5</sup>Department of Radiation Oncology, University of Pittsburgh School of Medicine, Pittsburgh, PA  
24 USA, <sup>6</sup>Department of Pharmacology and Chemical Biology, University of Pittsburgh School of  
25 Medicine, Pittsburgh, PA USA,  
26  
27  
28  
29  
30  
31  
32

33 Running title: Echovirus 11 pathogenesis in mice  
34  
35  
36  
37  
38  
39  
40  
41

42 \*Address correspondence:  
43

44 Carolyn Coyne, PhD  
45 9116 Rangos Research Center  
46 UPMC Children's Hospital of Pittsburgh  
47 One Children's Hospital Way  
48 4401 Penn Avenue  
49 Pittsburgh, PA 15224  
50 Phone (412) 692-7519  
51 Email [coynec2@pitt.edu](mailto:coynec2@pitt.edu)

## 52 **Abstract**

53 Neonatal echovirus infections are characterized by severe hepatitis and neurological  
54 complications that can be fatal. Here, we show that expression of the human homologue of the  
55 neonatal Fc receptor (hFcRn), the primary receptor for echoviruses, and ablation of type I  
56 interferon (IFN) signaling are key host determinants involved in echovirus pathogenesis. We show  
57 that expression of hFcRn alone is insufficient to confer susceptibility to echovirus infections in  
58 mice. However, expression of hFcRn in mice deficient in type I interferon (IFN) signaling, hFcRn-  
59 IFNAR<sup>-/-</sup>, recapitulate the echovirus pathogenesis observed in humans. Luminex-based  
60 multianalyte profiling from E11 infected hFcRn-IFNAR<sup>-/-</sup> mice revealed a robust systemic immune  
61 response to infection, including the induction of type I IFNs. Furthermore, similar to the severe  
62 hepatitis observed in humans, E11 infection in hFcRn-IFNAR<sup>-/-</sup> mice caused profound liver  
63 damage. Our findings define the host factors involved in echovirus pathogenesis and establish *in*  
64 *vivo* models that recapitulate echovirus disease.

65

## 66 **Introduction**

67 Echoviruses are small (~30 nm) single-stranded RNA viruses that belong to the *Picornaviridae*  
68 family. Echoviruses consist of approximately 30 serotypes and are members of the Enterovirus  
69 genus, which are primarily transmitted through the fecal-oral route. Infants and neonates are often  
70 most severely impacted by echovirus infections, with the majority of enterovirus infections in  
71 infants below the age of two months caused by echoviruses<sup>1,2</sup>. Echovirus infections are  
72 particularly devastating in Neonatal Intensive Care Unit (NICU) outbreaks, where they account  
73 for 15-30% of nosocomial viral infections and can result in death of the neonate in as many as  
74 25% of cases<sup>3-6</sup>. Echovirus 11 (E11) is one of the most common serotypes associated with  
75 outbreaks in NICUs across the world<sup>7,8</sup>. Despite the severe clinical outcomes associated with  
76 echovirus infections, the tissue tropism and pathogenesis of infection remain largely unknown

77 due to the lack of established animal models to study E11 infection at secondary sites of infection,  
78 such as the liver and brain.

79 We and others previously identified the neonatal Fc receptor (FcRn) as a primary receptor for  
80 echoviruses<sup>9,10</sup>. Structural analysis has shown that the murine homologue of FcRn (mFcRn) does  
81 not support echovirus binding and entry<sup>10</sup>, which has also been shown experimentally in murine-  
82 derived primary cells and cell lines<sup>9</sup>. However, ectopic expression of human FcRn (hFcRn)  
83 renders murine-derived primary cells susceptible to echovirus infections<sup>9</sup>. FcRn is important for  
84 establishing passive immunity from mother to child through IgG transport across the placenta  
85 during human pregnancy or across the small intestine after birth in mice<sup>11</sup>. Additionally, FcRn is  
86 important for albumin homeostasis in liver hepatocytes and regulates the response to hepatic  
87 injury<sup>12</sup>. FcRn expression is maintained throughout life in the liver and many other tissue types in  
88 the body<sup>13</sup>. We have previously demonstrated in an oral infection model of suckling mice that E11  
89 disseminates from the gastrointestinal (GI) tract into the blood and liver, and that this  
90 dissemination is dependent on the expression of human FcRn<sup>9</sup>. Although the virus disseminated  
91 to the liver, very little detectable virus was observed in this and other tissues, occluding further  
92 studies of pathogenesis at secondary sites of infection.

93 The development of mouse models that recapitulate the hallmarks of enterovirus disease in  
94 humans has historically been challenging. Enteroviruses typically do not infect mice as the murine  
95 homolog of their receptors are often not sufficient for binding and entry. Others have developed  
96 mouse models of select enteroviruses including poliovirus, coxsackievirus B (CVB), and  
97 enterovirus 71 (EV71)<sup>14-16</sup>. These models often use immunodeficient humanized transgenic mice,  
98 which express the human homolog of the receptor while lacking expression of the interferon  $\alpha/\beta$   
99 receptor (IFNAR)<sup>15-19</sup>. Despite established *in vivo* models for other enteroviruses, echoviruses  
100 have few established mouse models. A previous echovirus 1 mouse model was established using  
101 transgenic mice expressing human integrin very late antigen 2 (VLA-2), the receptor for E1<sup>20</sup>,  
102 which inoculated newborn mice intracerebrally, resulting in paralysis of the transgenic mice<sup>21</sup>.

103 However, the host determinants involved in restricting echovirus infections *in vivo* remain largely  
104 unknown.

105 Here, we define the host determinants of echovirus infection and developed parallel adult and  
106 suckling mouse models of E11 infection. We show that immunocompetent animals that express  
107 hFcRn under the native human promotor (hFcRn<sup>Tg32</sup>) are largely resistant to E11 infection  
108 following intraperitoneal (IP) inoculation. In addition, immunodeficient mice lacking IFNAR  
109 expression (IFNAR<sup>-/-</sup>) alone are also refractory to infection. In contrast, hFcRn<sup>Tg32</sup> animals that are  
110 also deficient in IFNAR expression (hFcRn<sup>Tg32</sup>-IFNAR<sup>-/-</sup>) are highly permissive to E11 infection  
111 and high levels of viral replication occur in the liver and pancreas, which reflects the tissue sites  
112 most commonly targeted in infected human neonates<sup>22,23</sup>. Luminex-based multianalyte profiling  
113 of whole blood revealed that hFcRn<sup>Tg32</sup>-IFNAR<sup>-/-</sup> infected animals induced a robust systemic  
114 immune response to infection, including high levels of type I IFNs. Using RNASeq-based  
115 transcriptional profiling, we also show that the livers of hFcRn<sup>Tg32</sup>-IFNAR<sup>-/-</sup> mice mount a pro-  
116 inflammatory and antiviral signaling cascade in response to infection. Finally, using hybridization  
117 chain reaction (HCR) with specific probes against the E11 genome, we show that hepatocytes  
118 are the main cell type infected in the liver. Our data thus define hFcRn and type I IFN signaling  
119 as key host determinant of E11 pathogenesis in the liver and suggest that these factors could be  
120 targeted therapeutically to control infection.

121

## 122 **Results**

### 123 **Human FcRn and Type I IFN signaling are key host determinants of E11 infection**

124 Given that the most severe outcomes of E11 infections in humans are in neonates, we first  
125 performed studies in suckling (7 day old) mice. We inoculated immunocompetent wild-type  
126 C57BL/6 (WT) and hFcRn<sup>Tg32</sup> suckling mice with 10<sup>4</sup> plaque forming units (PFU) of E11 by the IP  
127 route. Animals were sacrificed at 72 hours post inoculation (hpi) and tissues were collected for  
128 viral titration by plaque assay. Because an IP echovirus mouse model has not been established

129 previously, we collected a diverse range of tissues (e.g. brain, liver, pancreas, small intestine) to  
130 determine the tissue tropism of E11 *in vivo*. WT and hFcRn<sup>Tg32</sup> animals exhibited low to  
131 undetectable levels of infection in all of the tissues tested (**Figure 1A-F**). For example, only 2 of  
132 12 WT animals and 2 of 13 hFcRn<sup>Tg32</sup> animals had any detectable virus in liver and 0 of 12 WT  
133 mice and 1 of 13 hFcRn<sup>Tg32</sup> mice had detectable virus in the brain, although in both cases, viral  
134 titers were very low (**Figure 1B, 1F**). Because many enteroviruses are restricted by type I IFN  
135 signaling in small animal models and because we have previously shown that E11 is sensitive to  
136 recombinant IFN- $\beta$  treatment<sup>24</sup>, we reasoned that type I IFNs might play a key role in restricting  
137 E11 infection *in vivo*. To test this, we infected suckling mice deficient in type I IFN signaling  
138 (IFNAR<sup>-/-</sup>) with 10<sup>4</sup> PFU E11 by the IP route. However, we found that these animals were also  
139 largely resistant to E11 infection, with most animals having no detectable circulating virus in blood  
140 or replicating virus in tissues (4 of 12 animals had detectable virus in the blood and liver) (**Figure**  
141 **1A-F**). These data show that expression of hFcRn or ablation of type I IFN signaling alone is  
142 insufficient to confer susceptibility to E11 replication.

143 We next determined whether expression of hFcRn in the context of ablation of IFNAR-  
144 mediated signaling would be sufficient for E11 infection in mice. To do this, we generated  
145 hFcRn<sup>Tg32</sup> mice that are deficient in IFNAR expression (hFcRn<sup>Tg32</sup>-IFNAR<sup>-/-</sup>). Similar to the studies  
146 described above, we inoculated suckling hFcRn<sup>Tg32</sup>-IFNAR<sup>-/-</sup> mice with E11 by IP inoculation. In  
147 contrast to animals expressing hFcRn or lacking IFNAR expression alone, we found that  
148 hFcRn<sup>Tg32</sup>-IFNAR<sup>-/-</sup> suckling mice were highly permissive to E11 infection, with high levels of  
149 infectious virus circulating in blood (17 of 18 animals, **Figure 1A**). Similarly, hFcRn<sup>Tg32</sup>-IFNAR<sup>-/-</sup>  
150 animals had significantly more detectable infectious virus in livers compared to other genotypes  
151 (18 of 18 with detectable virus in liver) (**Figure 1B**). In addition to liver, we also observed high  
152 viral loads in the pancreas of hFcRn<sup>Tg32</sup>-IFNAR<sup>-/-</sup> animals (18 of 18 with detectable virus, **Figure**  
153 **1C**). We also observed increased viral titers in the stool, small intestine, and brain, which all  
154 contained moderate to high levels of viral infection in hFcRn<sup>Tg32</sup>-IFNAR<sup>-/-</sup> mice (**Figure 1D-F**).

155 These results show that hFcRn<sup>Tg32</sup>-IFNAR<sup>-/-</sup> suckling mice are highly permissive to E11  
156 inoculation.

157 We next determined whether hFcRn and IFN signaling played a role in echovirus  
158 pathogenesis in adult (6-week-old) mice. Similar to our findings in suckling mice, we found that  
159 WT, hFcRn<sup>Tg32</sup>, and IFNAR<sup>-/-</sup> mice were largely resistant to E11 infection (**Figure 2A-F**). In  
160 contrast to suckling mice, immunocompetent animals (WT and hFcRn<sup>Tg32</sup>) had no detectable  
161 circulating virus and a majority of IFNAR<sup>-/-</sup> animals also completely resisted infection (2 of 16 with  
162 detectable virus in the blood) (**Figure 2A**). In contrast, hFcRn<sup>Tg32</sup>-IFNAR<sup>-/-</sup> animals had significant  
163 levels of viral replication in the blood (12 of 23 with detectable virus), liver (20 of 23 with detectable  
164 virus) and pancreas (13 of 23 with detectable virus), similar to what was observed in suckling  
165 pups (**Figure 2A-C**). Additionally, these animals had low levels of detectable virus in the stool and  
166 small intestine suggesting this is not a main site of replication following IP inoculation (**Figure 2D**  
167 **& 2E**). In contrast to suckling mice, adult hFcRn<sup>Tg32</sup>-IFNAR<sup>-/-</sup> animals did not contain high levels  
168 of detectable virus in the brain (only 3 of 23 animals), suggesting age-related differences between  
169 adult and suckling mice (**Figure 2F**). Taken together, these data show that both hFcRn and type  
170 I IFNs are key regulators of E11 infection of suckling mice and adult mice and that the liver is a  
171 key target site of replication *in vivo*.

172

173 **hFcRn<sup>Tg32</sup>-IFNAR<sup>-/-</sup> animals induce a robust proinflammatory immune response to E11**  
174 **infection**

175 Due to the high levels of viremia in adult hFcRn<sup>Tg32</sup>-IFNAR<sup>-/-</sup> mice, we next characterized the  
176 systemic immune response to E11 infection in these animals. To do this, we performed Luminex-  
177 based multiplex assays to assess the levels of 45 circulating cytokines and chemokines in the  
178 blood of adult animals infected with E11. Consistent with their low levels of infection, we observed  
179 no significant changes in the levels of circulating cytokines and chemokines in immunocompetent  
180 (WT, hFcRn<sup>Tg32</sup>) or immunodeficient (IFNAR<sup>-/-</sup>) mice (**Figure 3A**). In contrast, the blood of infected

181 hFcRn<sup>Tg32</sup>-IFNAR<sup>-/-</sup> animals contained high levels of various cytokines and chemokines in  
182 response to infection, with 19 cytokines/chemokines induced  $\geq$  2-fold compared to uninfected  
183 controls (**Figure 3A**). The two most induced cytokines were members of the type I IFN family,  
184 IFN- $\alpha$  and IFN- $\beta$ . On average, 7,802pg/mL of IFN- $\beta$  was circulating in the blood of hFcRn<sup>Tg32</sup>-  
185 IFNAR<sup>-/-</sup> animals, while WT, hFcRn<sup>Tg32</sup>, and IFNAR<sup>-/-</sup> animals had little to no circulating IFN- $\beta$   
186 (**Figure 3B**). Similarly, hFcRn<sup>Tg32</sup>-IFNAR<sup>-/-</sup> animals had an average of 165pg/mL circulating IFN-  
187  $\alpha$  in blood while WT, hFcRn<sup>Tg32</sup>, and IFNAR<sup>-/-</sup> animals had very low to undetectable levels (**Figure**  
188 **3C**). In addition to type I IFN induction, a number of chemokines, including monocyte  
189 chemoattractant protein 1 (MCP-1/CCL2), B cell attracting chemokine 1 (BCA-1/CXCL13), IP-  
190 10/CXCL10, and IL-12(p40) were present at very high levels in E11 infected hFcRn<sup>Tg32</sup>-IFNAR<sup>-/-</sup>  
191 mice (**Figure 3D-G**). These data show adult hFcRn<sup>Tg32</sup>-IFNAR<sup>-/-</sup> animals mount a potent immune  
192 response, including very high levels of type I IFNs, in response to E11 infection.

193

#### 194 **Infection and immune responses peak at 72h post-inoculation**

195 Next, we determined the kinetics of the immune responses to E11 infection in hFcRn<sup>Tg32</sup>-IFNAR<sup>-/-</sup>  
196 <sup>-/-</sup> mice. To do this, we infected hFcRn<sup>Tg32</sup>-IFNAR<sup>-/-</sup> animals with E11 and sacrificed at either 24,  
197 48, or 72hpi and measured viral titers by plaque assays and immune induction by Luminex-based  
198 multiplex assays for 34 cytokines and chemokines. We found that there were measurable levels  
199 of virus present in key target tissues such as the blood, liver and pancreas by as early as 24hpi,  
200 with levels peaking at 72hpi (**Figure 4A-D**). Consistent with these kinetics, we found that the  
201 levels of circulating cytokines increased at 24hpi and peaked at 72hpi as assessed by multianalyte  
202 Luminex-based profiling (**Figure 4E**). Strikingly, IFN- $\beta$  was induced over  $\sim$ 1,000pg/mL in animals  
203 infected for 24hrs and even higher in animals after 48hpi and 72hpi (**Figure 4F**). In addition, IFN-  
204  $\alpha$  and IFN- $\lambda$ 2/3 were increased at 72hpi compared to control and 24hpi (**Figure 4G & 4H**). In  
205 contrast to IFNs, other cytokines and chemokines including IP-10/CXCL10, MCP-1/CCL2, and

206 KC/CXCL1 were induced at highest levels at 48hpi, with levels decreasing by 72hpi (**Figure 4I-**  
207 **K**). These data suggest that animals induce an immune response to infection very early following  
208 the initiation of viral replication.

209

#### 210 **E11 infection induces damage and cell death in the livers of hFcRn<sup>Tg32</sup>-IFNAR<sup>-/-</sup> animals**

211 Echovirus infections in neonates commonly induces liver failure, which can be fatal<sup>23</sup>. In addition,  
212 our data suggested that the highest levels of E11 replication in hFcRn<sup>Tg32</sup>-IFNAR<sup>-/-</sup> mice was in  
213 the liver. Thus, we focused on the impact of E11 infection on the liver as a contributor to disease.  
214 Blinded pathology scoring of H&E stained sections of infected livers revealed no histopathologic  
215 changes in immunocompetent animals or in IFNAR<sup>-/-</sup> adult or suckling mice infected with E11  
216 (**Figure 5A-B, Supplemental Figure 1**). In contrast, there was moderate to severe liver damage  
217 induced by E11 infection of adult hFcRn<sup>Tg32</sup>-IFNAR<sup>-/-</sup> animals, including punctate hepatocytolysis  
218 and necrosis at 72hpi (**Figure 5A, Supplemental Figure 1**). Other histopathological changes  
219 included increased immune cell infiltration, which was also observed in infected hFcRn<sup>Tg32</sup>-IFNAR<sup>-/-</sup>  
220 <sup>-/-</sup> suckling mice (**Figure 5B**, black arrows). In addition to histopathology, we assessed the impact  
221 of infection on cell viability using an antibody specific for the cleaved (activated) version of  
222 caspase-3. Whereas E11 infection of immunocompetent and IFNAR<sup>-/-</sup> animals exhibited no  
223 cleaved caspase-3 staining as assessed by immunohistochemistry, E11-infected hFcRn<sup>Tg32</sup>-  
224 IFNAR<sup>-/-</sup> adults and suckling mice exhibited pronounced positive cleaved caspase-3 staining  
225 (**Figure 5C, 5D**). These data indicate that the livers of hFcRn<sup>Tg32</sup>-IFNAR<sup>-/-</sup> animals undergo  
226 apoptosis and cell death following E11 infection.

227

#### 228 **E11 infection of hFcRn<sup>Tg32</sup>-IFNAR<sup>-/-</sup> mice induces a robust local proinflammatory immune** 229 **response in the liver**

230 Because we found that the livers of hFcRn<sup>Tg32</sup>-IFNAR<sup>-/-</sup> mice infected with E11 exhibited  
231 histopathologic changes and underwent cell death, we profiled other liver changes by RNAseq



232 transcriptional profiling. Consistent with our Luminex-based profiling studies of circulating  
233 cytokines, we found that the livers of hFcRn<sup>Tg32</sup>-IFNAR<sup>-/-</sup> animals infected with E11 robustly  
234 induced expression of the transcripts for type I IFNs, with less robust induction of type III IFNs  
235 (**Figure 6A**). Levels of vRNA in infected animals mirrored our findings on infectious viral titers,  
236 with high levels in hFcRn<sup>Tg32</sup>-IFNAR<sup>-/-</sup> mice (**Figure 6B**). In addition to these changes, hFcRn<sup>Tg32</sup>-  
237 IFNAR<sup>-/-</sup> infected animals also induced the expression of other pro-inflammatory and  
238 immunomodulatory factors, including chemokines (e.g. Ccl2, Cxcl1, Cxcl9), transcription factors  
239 (e.g. Stat1, Stat3, Socs1), and interferon stimulated genes (e.g. Isg15, Ifit1) (**Figure 6C, D**).

240

#### 241 **E11 specifically infects hepatocytes in hFcRn<sup>Tg32</sup>-IFNAR<sup>-/-</sup> mice**

242 Finally, we defined the cellular tropism of E11 within the liver. Using immunohistochemistry for  
243 the viral VP1 capsid protein, we found that E11 localized primarily in what appeared to be  
244 hepatocytes (**Figure 7A**). No positive staining for VP1 was observed in any other three mouse  
245 strains (**Figure 7A**). hFcRn<sup>Tg32</sup>-IFNAR<sup>-/-</sup> suckling mice also displayed positive VP1 staining in the  
246 liver (**Supplemental Figure 2**). Although VP1 staining suggested that E11 replication occurred  
247 primarily in hepatocytes, we developed a more sensitive approach to define the cellular tropism  
248 of E11 using hybridization chain reaction (HCRv3.0). HCR allows for multiplexed quantitative RNA  
249 fluorescence *in situ* hybridization (RNA-FISH) and the signal amplification inherent to the  
250 technique vastly enhances the dynamic range and sensitivity of conventional FISH-based  
251 approaches<sup>25-27</sup>. To do this, we designed probes specific for the E11 genome and performed HCR  
252 on liver sections from hFcRn<sup>Tg32</sup>-IFNAR<sup>-/-</sup> mice infected with E11 (schematic, **Figure 7B**). To  
253 define the localization of E11 specifically to hepatocytes, we also developed probes to albumin,  
254 a specific marker of hepatocytes. Using HCR, we observed the presence of E11 vRNA in the  
255 livers of infected mice by 24hpi, with the numbers of positive cells increasing by 48-72hpi (**Figure**  
256 **7C**). Interestingly, E11 vRNA positive cells exclusively colocalized with albumin, identifying  
257 hepatocytes as the main cellular target of infection in the liver. To confirm this, we quantified three

258 fields at each time point and quantified colocalization between vRNA and albumin signals, which  
259 revealed a strong colocalization (Pearson's coefficient 24hpi – 0.73, 48hrs – 0.85, 72hpi – 0.84).  
260 Together, these data show that E11 replicates in liver hepatocytes in hFcRn<sup>Tg32</sup>-IFNAR<sup>-/-</sup> animals.

261

## 262 **Discussion**

263 Here, we show that human FcRn and type I IFN signaling are key host determinants that control  
264 E11 infection in the liver, a tissue site commonly associated with human disease. Through  
265 Luminex-based multianalyte and RNASeq-based transcriptional profiling, we also show that  
266 animals expressing hFcRn and ablated in type I IFN signaling initiate a systemic immune  
267 response to infection. Furthermore, we show that E11 replication in the liver induces  
268 histopathological changes and apoptotic cell death in hepatocytes. Our findings thus define  
269 proviral (hFcRn) and antiviral (type I IFN) host factors that control echovirus infections specifically  
270 in the liver. In addition, our studies provide a novel animal model that can be used to test anti-  
271 echovirus therapeutics.

272 Although FcRn has been identified as a pan-echovirus receptor<sup>9,10</sup>, its role in mediating  
273 echovirus pathogenesis has remained unclear. Previous work has shown that FcRn is expressed  
274 in many different cell types in the body, including the small intestine<sup>28,29</sup> and in liver  
275 hepatocytes<sup>30,31</sup>. Despite what its name implies, FcRn is expressed on many cells throughout life,  
276 often at very high levels. Our results shown here define the organs targeted by E11 in an *in vivo*  
277 model, with high levels of replication in various tissues, such as the liver and pancreas. Our  
278 parallel adult and suckling pup models allowed us to compare age-related differences that might  
279 impact sensitivity or responses to echovirus infections. Of note, the animals used in our studies  
280 express hFcRn under the control of the endogenous promoter, which might mimic age-related  
281 changes in expression observed in humans. Interestingly, although we detected high levels of  
282 echovirus replication in similar tissues between adults and suckling pups, there were age-related  
283 differences in viral infection in the brains of these mice. Whereas 16 of 18 of infected hFcRn<sup>Tg32</sup>-

284 IFNAR<sup>-/-</sup> suckling mice exhibited replication in the brain, only 3 of 23 adult animals did. Although  
285 this could be attributed to differences on the relative ratio of weight to viral inoculum, circulating  
286 viral titers in the blood were similar between suckling pups and adult mice. Given that echovirus  
287 infections are commonly associated with aseptic meningitis in neonates, these findings suggest  
288 that expression levels of hFcRn and type I IFN signaling could be key determinants of age-related  
289 susceptibility in key sites targeted in humans, such as the liver and brain.

290 The liver is a primary site of echovirus-associated disease, with hepatitis and acute liver failure  
291 commonly observed in infected infants and children and the majority of echovirus-associated  
292 death in neonates occurs due to overwhelming liver failure<sup>32</sup>. Our *in vivo* findings suggest that  
293 FcRn expression is required for this infection only when host type I IFN signaling is ablated. In  
294 addition to IFNs, we observed induction of a number of other immunomodulatory factors in  
295 infected animals. The role of cytokines in echovirus pathogenesis in humans is not known.  
296 However, immunodeficient individuals, including adults, are more susceptible to echovirus  
297 infections, which often induces hepatitis<sup>33-36</sup>. In addition, analysis of mutations in the E11 genome  
298 induced by selective pressure in an immunodeficient individual who developed chronic infection  
299 revealed strikingly high sequence conservation in the 3C virally-encoded protease which often  
300 attenuates host cell innate immune signaling<sup>36</sup>. Our studies suggest that type I IFNs are the  
301 primary drivers of resistance to echovirus infections in the liver, which is supported by our  
302 RNASeq studies, in which low levels of the transcripts for type III IFNs were upregulated by  
303 infection. These findings are similar to those for the related enterovirus coxsackievirus B3 (CVB3),  
304 whose infection in the liver is also regulated primarily by type I IFN signaling<sup>19</sup>. Collectively, our  
305 studies show that expression of hFcRn in the setting of diminished type I IFN signaling is the  
306 primary driver of E11 infection in the liver.

307 Despite the clear hepatic tropism of echoviruses, little is known regarding the cell type(s)  
308 targeted by echoviruses in the liver or how these cells respond to infection. Moreover, the role of  
309 FcRn in mediating this tropism is unknown. The liver is composed of diverse cell types. In addition

310 to hepatocytes, which comprise ~80% of total liver cells, tissue resident Kupffer Cells represent  
311 ~35% and liver sinusoidal endothelial cells comprise ~50% of non-parenchymal cells. FcRn is  
312 thought to be expressed in all of these cell types<sup>37</sup>. Our studies thus define the tropism of  
313 echoviruses specifically to hepatocytes and show that FcRn expression is a key determinant of  
314 this tropism. In addition, our studies suggest that echovirus infection of hepatocytes induces  
315 pronounced hepatic damage, characterized by apoptotic cell death and tissue damage. These  
316 findings are consistent with what is observed in autopsy tissue isolated from echovirus infected  
317 neonates, which also indicates extensive infection-induced hepatocyte damage<sup>23,35,38,39</sup>.

318 Consistent with high levels of infection in the liver, hFcRn<sup>Tg32</sup>-IFNAR<sup>-/-</sup> infected animals also  
319 exhibited infectious virus present in the stool. Given that echoviruses are transmitted by the fecal-  
320 oral route, defining how viral particles are shed and subsequently transmitted is important for  
321 understanding pathogenesis and spread. Because infected animals did not have high titers in the  
322 small intestine (~10<sup>2</sup> PFU/mg on average), our data indicate that shed virus does not result from  
323 direct intestinal infection, which is expected given the route of inoculation. The most likely scenario  
324 is via the gut-liver axis. Many studies have shown that the bacteria and bacterial products can  
325 reach the liver through the portal vein and liver secretory products, such as bile acids, IgA, and  
326 antimicrobial molecules, can leave the liver into the intestines through the biliary tract<sup>40,41</sup>. It is  
327 thus likely that infectious virus exits the liver through the biliary tract into the intestine where it  
328 exits the body in the stool, explaining the high stool titers with little to no infectious virus in the  
329 intestine itself.

330 There are currently no effective antiviral therapeutics to combat echovirus infections. Our work  
331 thus establishes *in vivo* models that full recapitulate echovirus infection in human neonates and  
332 could thus be used to develop and test antivirals. In addition, our studies define key roles for FcRn  
333 and type I IFN signaling in mediating echovirus pathogenesis and suggest these factors could be  
334 targeted to ameliorate or prevent infections. Collectively, this work defines fundamental aspects

335 of echovirus biology that enhance our understanding of how infection, tissue targeting, and  
336 disease occurs.

337

338

### 339 **Materials and Methods**

340 **Cell lines and viruses.** HeLa cells (clone 7B) were provided by Jeffrey Bergelson, Children's  
341 Hospital of Philadelphia, Philadelphia, PA, and cultured in MEM supplemented with 5% FBS, non-  
342 essential amino acids, and penicillin/streptomycin. Experiments were performed with echovirus  
343 11 Gregory (E11), which was obtained from the ATCC. Virus was propagated in HeLa cells and  
344 purified by ultracentrifugation over a 30% sucrose cushion, as described previously<sup>42</sup>.

345

346 **Animals.** All animal experiments were approved by the University of Pittsburgh Animal Care and  
347 Use Committee and all methods were performed in accordance with the relevant guidelines and  
348 regulations. C57BL/6J (WT, cat. no. 000664), B6.Cg-*Fcgr*<sup>tm1Dcr</sup>Tg(FCGRT)32Dcr/DcrJ  
349 (hFcRn<sup>Tg32</sup>, cat. no. 014565), B6(Cg)-*Ifnar1*<sup>tm1.2Ees</sup>/J (IFNAR<sup>-/-</sup>, cat. no. 028288) were purchased  
350 from The Jackson Laboratory. hFcRn<sup>Tg32</sup>-IFNAR<sup>-/-</sup> mice were generated by crossing B6.129S2-  
351 *Ifnar1*<sup>tm1Agt</sup>/Mmjax (cat no. 32045-JAX) with B6.Cg-*Fcgr*<sup>tm1Dcr</sup> Tg(FCGRT)32Dcr/DcrJ (cat no.  
352 014565). Breeders were established that were deficient in mouse FcRn and IFNAR and were  
353 homozygous for the hFcRn transgene. All animals used in this study were genotyped by  
354 Transnetyx.

355

356 **Adult animal infections.** 6-7-week-old mice were inoculated by the intraperitoneal route with 10<sup>4</sup>  
357 PFU of E11. Intraperitoneal inoculation was performed using a 1mL disposable syringe and a 25-  
358 gauge needle in 100μL of 1X PBS. Mice were euthanized at 3 days post inoculation, or at times  
359 specified in the figure legends, and organs harvested into 1mL of DMEM (viral titration) or RNA  
360 lysis buffer (RNA isolation) and stored at -80°C. Tissue samples for viral titration were thawed

361 and homogenized with a TissueLyser LT (Qiagen) for 8 minutes, followed by brief centrifugation  
362 for 5 minutes at 5000 x g. Viral titers in organ homogenates were determined by plaque assay in  
363 HeLa cells overlaid with a 1:1 mixture of 1% agarose and 2x MEM (4% FBS, 2% pen/strep, 2%  
364 NEAA). Plaques were enumerated 40hpi following crystal violet staining.

365

366 **Suckling pup infections.** 7-day-old mice were inoculated by the intraperitoneal route with  $10^4$   
367 PFU of E11. Two separate litters were inoculated for each condition. Intraperitoneal inoculation  
368 was performed using a 1mL disposable syringe and a 27-gauge needle in 50 $\mu$ L of 1X PBS. Mice  
369 were euthanized at 3 days post inoculation and organs harvested into 0.5mL of DMEM (viral  
370 titration) or RNA lysis buffer (RNA isolation) and stored at -80°C. Tissue samples for viral titration  
371 were thawed and homogenized with a TissueLyser LT (Qiagen) for 5 minutes, followed by brief  
372 centrifugation for 5 minutes at 8000 x g. Viral titers in organ homogenates were determined by  
373 TCID<sub>50</sub> in HeLa cells and enumerated following crystal violet staining.

374

375 **Immunohistochemistry.** Tissues were fixed in 10% buffered formalin for 24hrs and then  
376 transferred to 70% ethanol. Tissues were embedded in paraffin and sectioned. Slides were  
377 stained with a monoclonal VP1 antibody, as described previously<sup>9</sup>, or cleaved caspase 3. Tissue  
378 sections were deparaffinized with xylene and rehydrated with decreasing concentrations of  
379 ethanol (100%, 95%, 80%), then washed with ddH<sub>2</sub>O. Antigen unmasking was performed with  
380 slides submerged in 10 mM citrate buffer (pH 6.0) and heated in a steamer for 20 minutes at  
381 ~90°C. Slides were cooled to room temperature and slides were immunostained with cleaved  
382 caspase 3 using Vectastain Elite ABC HRP (Vector Biolabs, PK-6100), according to the  
383 manufacturer's instructions. Slides were incubated in 6% H<sub>2</sub>O<sub>2</sub> in methanol for 30 min then  
384 washed 3 times for 5 minutes in H<sub>2</sub>O. Avidin block (Vector, SP-2001) was applied for 15 minutes  
385 and washed twice in H<sub>2</sub>O followed by biotin block (Abcam, ab156024) for 15 minutes and washed

386 twice in H<sub>2</sub>O. Finally, serum-free protein block was applied for 10 minutes and cleaved caspase  
387 3 antibody was diluted 1:100 in TBS-T (Tris-buffered saline, 0.1% Tween 20) and slides incubated  
388 overnight in a humidified chamber at 4C. Next, slides were washed three times for 5 min in PBST  
389 and exposed to the goat anti-rabbit biotinylated secondary antibody (Vector, BA-1000) for 30 min.  
390 Slides were rinsed in PBST three times for 5 min and the Vectastain Elite ABC HRP kit was  
391 applied for 30 min. Slides were rinsed in PBST for three times for 5 min and diaminobenzidine  
392 substrate for 5 mins; which was terminated with water incubation. Slides were counterstained with  
393 hematoxylin for 1 min, thoroughly rinsed with H<sub>2</sub>O, and incubated in 0.1% sodium bicarbonate in  
394 H<sub>2</sub>O for 5 mins. Slides were then dehydrated with increasing concentrations of ethanol, cleared  
395 with xylene and mounted with Cytoseal 60 (Thermo Scientific, 83104). Images were captured on  
396 an IX83 inverted microscope (Olympus) using a UC90 color CCD camera (Olympus).

397

398 **Antibodies.** The following antibodies were used- anti-VP1 (NCL-ENTERO, clone 5-D8/1, Leica  
399 Biosystems) and cleaved caspase 3 (Asp175) (9661, Cell Signaling).

400

401 **HCR and Imaging.** HCR was performed following the Molecular Instruments HCR v3.0 protocol  
402 for FFPE human tissue sections<sup>25,27</sup>. Briefly, tissue sections were deparaffinized with xylene and  
403 rehydrated with decreasing concentrations of ethanol (100%, 95%, 80%). Antigen unmasking was  
404 performed with slides submerged in 10 mM citrate buffer (pH 6.0) and heated in a steamer for 20  
405 minutes at ~90°C. Slides were cooled to room temperature. Sections were treated with 10 µg/mL  
406 Proteinase K for 10 min at 37°C and washed with RNase free water. Samples were incubated for  
407 10 minutes at 37°C in hybridization buffer. Sections were incubated overnight in a humidified  
408 chamber at 37°C with 0.4 pmol of initiator probes in hybridization buffer (Table 1 echovirus probes,  
409 Table 2 albumin probes). The next day, slides were washed in probe wash buffer and 5x SSCT  
410 for 4x 15 min, according to the manufacturer's instructions. Samples were incubated in a

411 humidified chamber at 37°C for 30 minutes in amplification buffer. Fluorescent hair pins were  
412 heated to 95°C for 90 seconds and snap cooled at room temperature for 30 min. Hairpins and  
413 amplification buffer were added to the sample and incubated overnight at room temperature.  
414 Hairpins were washed off with 5x SSCT for 5 minutes, 15 minutes, 15 minutes, and 5 minutes.  
415 Slides were mounted in vectashield with DAPI. Slides were imaged on an IX83 inverted microscope  
416 (Olympus) with ORCA-FLASH 4.0 camera. Olympus CellSens advanced imaging software with  
417 the deconvolution package, constrained iterative, was used.

418

419 **RNA extraction and RNAseq.** Total RNA was prepared using the Sigma GenElute total  
420 mammalian RNA miniprep kit with optional DNase step, according to the protocol of the  
421 manufacturer. RNA quality was assessed by Nanodrop and an Agilent RNA Screen Tape System,  
422 and 1ug was used for library preparation using RNA with Poly A selection kit (Illumina), as per the  
423 manufacturer's instructions. Sequencing was performed on an Illumina HiSeq. RNA-seq FASTQ  
424 data were processed and mapped to the mouse reference genome (GRCm38) using CLC  
425 Genomics Workbench 20 (Qiagen). Differential gene expression was performed using the  
426 DESeq2 package in R<sup>43</sup>. Heatmaps were made in R using the pheatmap: pretty heatmaps  
427 package shown as the log<sub>2</sub>RPKM. Raw sequencing files have been deposited in Sequence Read  
428 Archives (SUB8204864, PRJNA665496).

429

430 **Luminex assays.** Luminex profiling was performed on whole blood that was allowed to clot for  
431 20 minutes and then spun down using a custom mouse IFN kit (IFN alpha, IFN beta, IL-28,  
432 Invitrogen), mouse cytokine 23-plex (Bio-Rad, M60009RDPD), and mouse chemokine 31-plex  
433 (Bio-Rad, 12009159), according to the manufacturer's protocol. Assays were read on a Millipore  
434 MagPix machine by the Luminex Corporation. Heat maps were generated using the fold change  
435 in concentration (picograms/milliliter) of each animal compared to the average of uninfected



436 animals and was made in GraphPad Prism. Violin plots are shown as the concentration for each  
437 animal (one point) in picograms/milliliter.

438

439 **Statistics.** All statistical analysis was performed using GraphPad Prism version 8. Data are  
440 presented as mean  $\pm$  SD. A one-way ANOVA was used to determine statistical significance, as  
441 described in the figure legends. Parametric tests were applied when data were distributed  
442 normally based on D'Agostino–Pearson analyses; otherwise nonparametric tests were applied. P  
443 values of  $<0.05$  were considered statistically significant, with specific P values noted in the figure  
444 legends.

445

446 **Literature cited**

- 447 1. Khetsuriani, N., Lamonte-Fowlkes, A., Oberst, S. & Pallansch, M. A. Enterovirus  
448 surveillance--United States, 1970-2005. *MMWR. Surveill. Summ. Morb. Mortal. Wkly.*  
449 *report. Surveill. Summ. / CDC* (2006).
- 450 2. Morens, D. M. Enteroviral disease in early infancy. *J. Pediatr.* (1978). doi:10.1016/S0022-  
451 3476(78)80422-3
- 452 3. Civardi, E. *et al.* Viral outbreaks in neonatal intensive care units: What we do not know.  
453 *Am. J. Infect. Control* **41**, 854–856 (2013).
- 454 4. Naing, Z. *et al.* Prevalence of viruses in stool of premature neonates at a neonatal  
455 intensive care unit. *J. Paediatr. Child Health* **49**, (2013).
- 456 5. Verboon-Maciolek, M. A., Krediet, T. G., Gerards, L. J., Fleer, A. & Van Loon, T. M.  
457 Clinical and epidemiologic characteristics of viral infections in a neonatal intensive care  
458 unit during a 12-year period. *Pediatr. Infect. Dis. J.* **24**, 901–904 (2005).
- 459 6. Isaacs, D. *et al.* Conservative Management of an Echovirus 11 Outbreak in a Neonatal  
460 Unit. *Lancet* **333**, 543–545 (1989).
- 461 7. Civardi, E. *et al.* Viral outbreaks in neonatal intensive care units: What we do not know.  
462 *Am. J. Infect. Control* **41**, 854–856 (2013).
- 463 8. Ho, S. Y. *et al.* Investigation and successful control of an echovirus 11 outbreak in  
464 neonatal intensive care units. *Pediatr. Neonatol.* **61**, 180–187 (2019).
- 465 9. Morosky, S. *et al.* The neonatal Fc receptor is a pan-echovirus receptor. *Proc. Natl. Acad.*  
466 *Sci.* **116**, 3758–3763 (2019).
- 467 10. Zhao, X. *et al.* Human Neonatal Fc Receptor Is the Cellular Uncoating Receptor for  
468 Enterovirus B. *Cell* **177**, 1–13 (2019).
- 469 11. Dickinson, B. L. *et al.* Bidirectional FcRn-dependent IgG transport in a polarized human  
470 intestinal epithelial cell line. *J. Clin. Invest.* **104**, 903–911 (1999).
- 471 12. Chaudhury, C. *et al.* The Major Histocompatibility Complex–related Fc Receptor for IgG  
472 (FcRn) Binds Albumin and Prolongs Its Lifespan. *J. Exp. Med.* **197**, 315–322 (2003).
- 473 13. Cianga, C., Cianga, P., Plamadeala, P. & Amalinei, C. Nonclassical major  
474 histocompatibility complex I-like Fc neonatal receptor (FcRn) expression in neonatal  
475 human tissues. *Hum. Immunol.* **72**, 1176–1187 (2011).
- 476 14. Ren, R., Costantini, F., Gorgacz, E. J., Lee, J. J. & Racaniello, V. R. Transgenic mice  
477 expressing a human poliovirus receptor: A new model for poliomyelitis. *Cell* **63**, 353–362  
478 (1990).
- 479 15. Fujii, K. *et al.* Transgenic mouse model for the study of enterovirus 71  
480 neuropathogenesis. doi:10.1073/pnas.1217563110
- 481 16. Wang, Y. & Pfeiffer, J. K. Emergence of a large-plaque variant in mice infected with  
482 coxsackievirus B3. *MBio* **7**, 1–10 (2016).
- 483 17. Khan, S. *et al.* Poliomyelitis in transgenic mice expressing CD155 under the control of the  
484 Tage4 promoter after oral and parenteral poliovirus inoculation. *J. Gen. Virol.* **95**, 1668–  
485 1676 (2014).
- 486 18. Ohka, S. *et al.* Establishment of a Poliovirus Oral Infection System in Human Poliovirus  
487 Receptor-Expressing Transgenic Mice That Are Deficient in Alpha/Beta Interferon  
488 Receptor. *J. Virol.* **81**, 7902–7912 (2007).
- 489 19. Koestner, W. *et al.* Interferon-beta expression and type I interferon receptor signaling of

- 490 hepatocytes prevent hepatic necrosis and virus dissemination in Coxsackievirus B3-  
491 infected mice. *PLoS Pathog.* **14**, 1–23 (2018).
- 492 20. Bergelson, J. M. *et al.* Identification of the Integrin VLA-2 as a Receptor for Echovirus 1.  
493 *Science (80-. )*. **255**, 1718–1720 (1992).
- 494 21. Hughes, S. A., Thaker, H. M. & Racaniello, V. R. Transgenic mouse model for echovirus  
495 myocarditis and paralysis. *Proc. Natl. Acad. Sci. U. S. A.* **100**, 15906–15911 (2003).
- 496 22. Garcia, A. G., Basso, N. G., Fonseca, M. E. & Outani, H. N. Congenital echo virus  
497 infection--morphological and virological study of fetal and placental tissue. *J. Pathol.* **160**,  
498 123–7 (1990).
- 499 23. Wang, J., Atchison, R. W., Walpusk, J. & Jaffe, R. Echovirus hepatic failure in infancy:  
500 report of four cases with speculation on the pathogenesis. *Pediatr. Dev. Pathol.* **4**, 454–  
501 60 (2001).
- 502 24. Good, C., Wells, A. I. & Coyne, C. B. Type III interferon signaling restricts Enterovirus 71  
503 infection of goblet cells. *Sci. Adv.* **5**, 1–11 (2019).
- 504 25. Choi, H. M. T. *et al.* Third-generation in situ hybridization chain reaction: Multiplexed,  
505 quantitative, sensitive, versatile, robust. *Dev.* **145**, 1–10 (2018).
- 506 26. Dirks, R. M. & Pierce, N. A. Triggered amplification by hybridization chain reaction. *Proc.*  
507 *Natl. Acad. Sci. U. S. A.* **101**, 15275–15278 (2004).
- 508 27. Choi, H. M. T. *et al.* Mapping a multiplexed zoo of mRNA expression. *Dev.* **143**, 3632–  
509 3637 (2016).
- 510 28. Shah, U. *et al.* Distribution of the IgG Fc receptor, FcRn, in the human fetal intestine.  
511 *Pediatr. Res.* **53**, 295–301 (2003).
- 512 29. Israel, E. J. *et al.* Expression of the neonatal Fc receptor, FcRn, on human intestinal  
513 epithelial cells. *Immunology* **92**, 69–74 (1997).
- 514 30. Pyzik, M. *et al.* Hepatic FcRn regulates albumin homeostasis and susceptibility to liver  
515 injury. *Proc. Natl. Acad. Sci.* **114**, E2862–E2871 (2017).
- 516 31. Blumberg, R. S. *et al.* A major histocompatibility complex class I- related Fc receptor for  
517 IgG on rat hepatocytes. *J Clin Invest. Clin. Invest* **95**, 2397–2402 (1995).
- 518 32. Bersani, I. *et al.* Neonatal acute liver failure due to enteroviruses: a 14 years single NICU  
519 experience. *J. Matern. Neonatal Med.* (2020). doi:10.1080/14767058.2018.1555806
- 520 33. Morgan, C., Thomson, S. J., Legg, J. & Narat, S. A Case of Fulminant Hepatitis due to  
521 Echovirus 9 in a Patient on Maintenance Rituximab Therapy for Follicular Lymphoma.  
522 *Case Rep. Hematol.* **2015**, 1–4 (2015).
- 523 34. Lefterova, M. I., Rivetta, C., George, T. I. & Pinsky, B. A. Severe hepatitis associated with  
524 an echovirus 18 infection in an immune-compromised adult. *J. Clin. Microbiol.* **51**, 684–  
525 687 (2013).
- 526 35. Bajema, K. L. *et al.* Acute Liver Failure Due to Echovirus 9 Associated With Persistent B-  
527 Cell Depletion From Rituximab. *Open Forum Infect. Dis.* **4**, 9–11 (2017).
- 528 36. Laassri, M. *et al.* Evolution of echovirus 11 in a chronically infected immunodeficient  
529 patient. *PLoS Pathog.* **14**, 1–18 (2018).
- 530 37. Latvala, S., Jacobsen, B., Otteneder, M. B., Herrmann, A. & Kronenberg, S. Distribution  
531 of FcRn Across Species and Tissues. *J. Histochem. Cytochem.* **65**, 321–333 (2017).
- 532 38. Ventura, K. C., Hawkins, H., Smith, M. B. & Walker, D. H. Fatal neonatal echovirus 6

- 533 infection: Autopsy case report and review of the literature. *Mod. Pathol.* (2001).  
534 doi:10.1038/modpathol.3880260
- 535 39. Pedrosa, C., Lage, M. J. & Virella, D. Congenital echovirus 21 infection causing fulminant  
536 hepatitis in a neonate. *BMJ Case Rep.* (2013). doi:10.1136/bcr-2012-008394
- 537 40. Tripathi, A. *et al.* The gut-liver axis and the intersection with the microbiome. *Nat. Rev.*  
538 *Gastroenterol. Hepatol.* **15**, 397–411 (2018).
- 539 41. Ohtani, N. & Kawada, N. Role of the Gut-Liver Axis in Liver Inflammation, Fibrosis, and  
540 Cancer: A Special Focus on the Gut Microbiota Relationship. *Hepatol. Commun.* **3**, 456–  
541 470 (2019).
- 542 42. Morosky, S., Lennemann, N. J. & Coyne, C. B. BPIFB6 Regulates Secretory Pathway  
543 Trafficking and Enterovirus Replication. *J. Virol.* **90**, 5098–5107 (2016).
- 544 43. Love, M. I., Huber, W. & Anders, S. Moderated estimation of fold change and dispersion  
545 for RNA-seq data with DESeq2. *Genome Biol.* **15**, 1–21 (2014).

546  
547

#### 548 **Acknowledgements**

549 We thank Charles Good (UPMC Children’s Hospital of Pittsburgh) and Kathryn Lemon (UPMC  
550 Cancer Center) for technical assistance, Jeffrey Bergelson (Children’s Hospital of Philadelphia)  
551 for reagents, Runjan Chetty (Brighton and Sussex University Hospitals NHS Trust) for blinded  
552 pathology analysis, and Terence Dermody (UPMC Children’s Hospital of Pittsburgh) for helpful  
553 suggestions. This project was supported by NIH R01-AI150151 (C.B.C), NIH R01-AI081759  
554 (C.B.C.), NIH T32-AI060525 (A.I.W), NIH F31-AI149866 (A.I.W), a Burroughs Wellcome  
555 Investigators in the Pathogenesis of Infectious Disease Award (C.B.C), and the UPMC Children’s  
556 Hospital of Pittsburgh (C.B.C). This project also used the UPMC Hillman Cancer Center Tissue  
557 and Research Pathology/Pitt Biospecimen Core and Animal Facility shared resources which are  
558 supported in part by award P30CA047904.

559 **Figure 1**

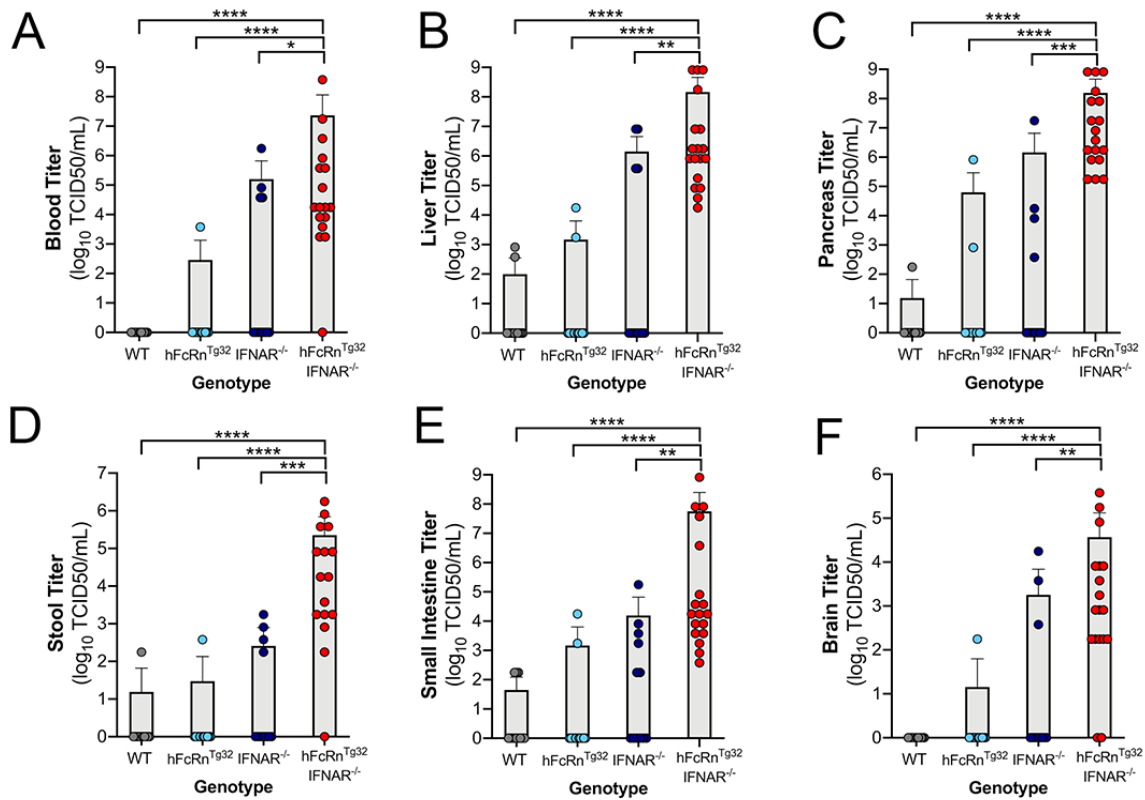

560  
561 **Figure 1. hFcRn<sup>Tg32</sup>-IFNAR<sup>-/-</sup> suckling mice are permissive to E11 infection.** C57Bl/6 (WT,  
562 gray), hFcRn<sup>Tg32</sup> (light blue), IFNAR<sup>-/-</sup> (dark blue), or hFcRn<sup>Tg32</sup>-IFNAR<sup>-/-</sup> (red) suckling mice were  
563 IP inoculated with 10<sup>4</sup> PFU of E11 and sacrificed 72 hours post inoculation. Viral titers  
564 (log<sub>10</sub>TCID<sub>50</sub>/mL) of suckling mice (WT – 12, hFcRn<sup>Tg32</sup> – 13, IFNAR<sup>-/-</sup> – 12, hFcRn<sup>Tg32</sup>-IFNAR<sup>-/-</sup>  
565 – 18 animals) in the blood (A), liver (B), pancreas (C), stool (D), small intestine (E), and brain (F)  
566 are shown as mean ± standard deviation and individual animals (points). Data are shown with  
567 significance determined with a Kruskal-Wallis test with a Dunn's test for multiple comparisons  
568 (\*p<0.05, \*\*p<0.005, \*\*\*p<0.0005, \*\*\*\*p<0.0001).  
569

570 **Figure 2**

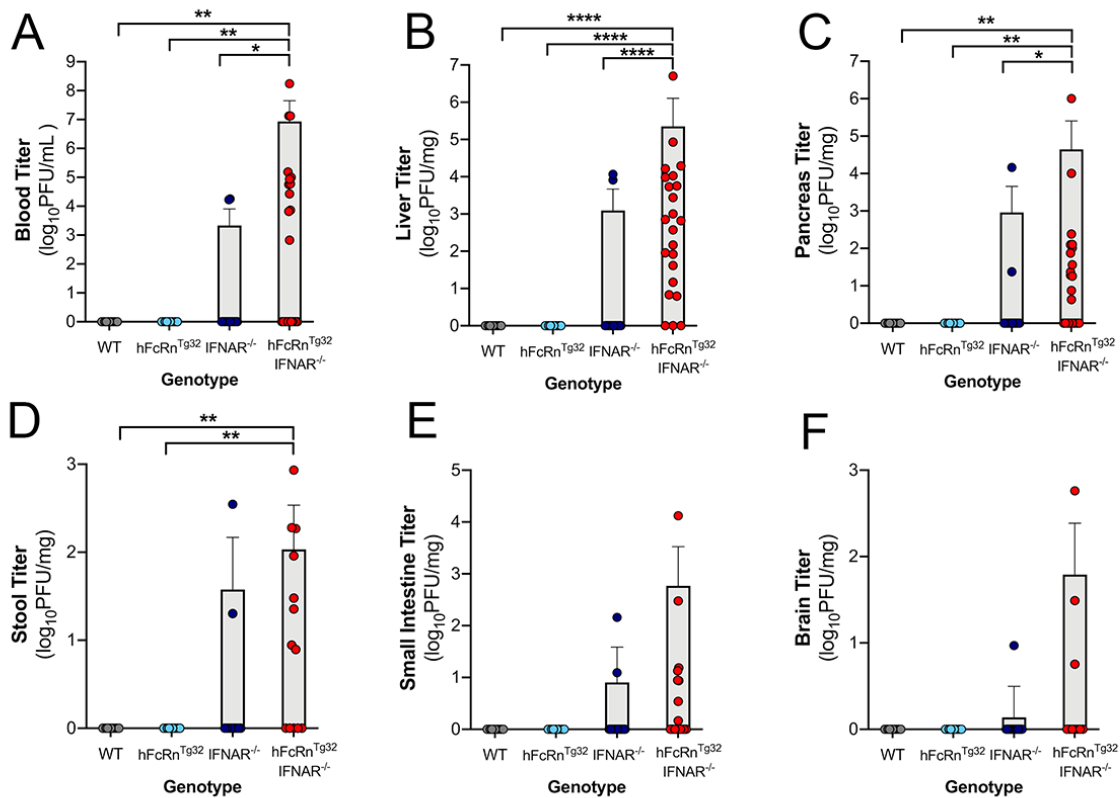

571  
572 **Figure 2. hFcRn<sup>Tg32</sup>-IFNAR<sup>-/-</sup> adult mice are permissive to E11 infection.** C57/BL6 (WT, gray),  
573 hFcRn<sup>Tg32</sup> (light blue), IFNAR<sup>-/-</sup> (dark blue), and hFcRn<sup>Tg32</sup>-IFNAR<sup>-/-</sup> (red) animals were IP  
574 inoculated with 10<sup>4</sup> PFU of E11 and sacrificed 72 hours post inoculation. (A) Viral titers in the  
575 blood (log<sub>10</sub>PFU/mL) of adult animals (WT – 11, hFcRn<sup>Tg32</sup> – 10, IFNAR<sup>-/-</sup> – 16, hFcRn<sup>Tg32</sup>-IFNAR<sup>-/-</sup> – 23  
576 animals). Viral titers in the liver (B), pancreas (C), stool (D), small intestine (E), and brain  
577 (F) (log<sub>10</sub>PFU/mg) from adult mice are shown as mean ± standard deviation bars and individual  
578 animals (points). Data are shown with significance determined with a Kruskal-Wallis test with a  
579 Dunn's test for multiple comparisons (\*p<0.05, \*\*p<0.005, \*\*\*p<0.0005, \*\*\*\*p<0.0001).  
580

581 **Figure 3**

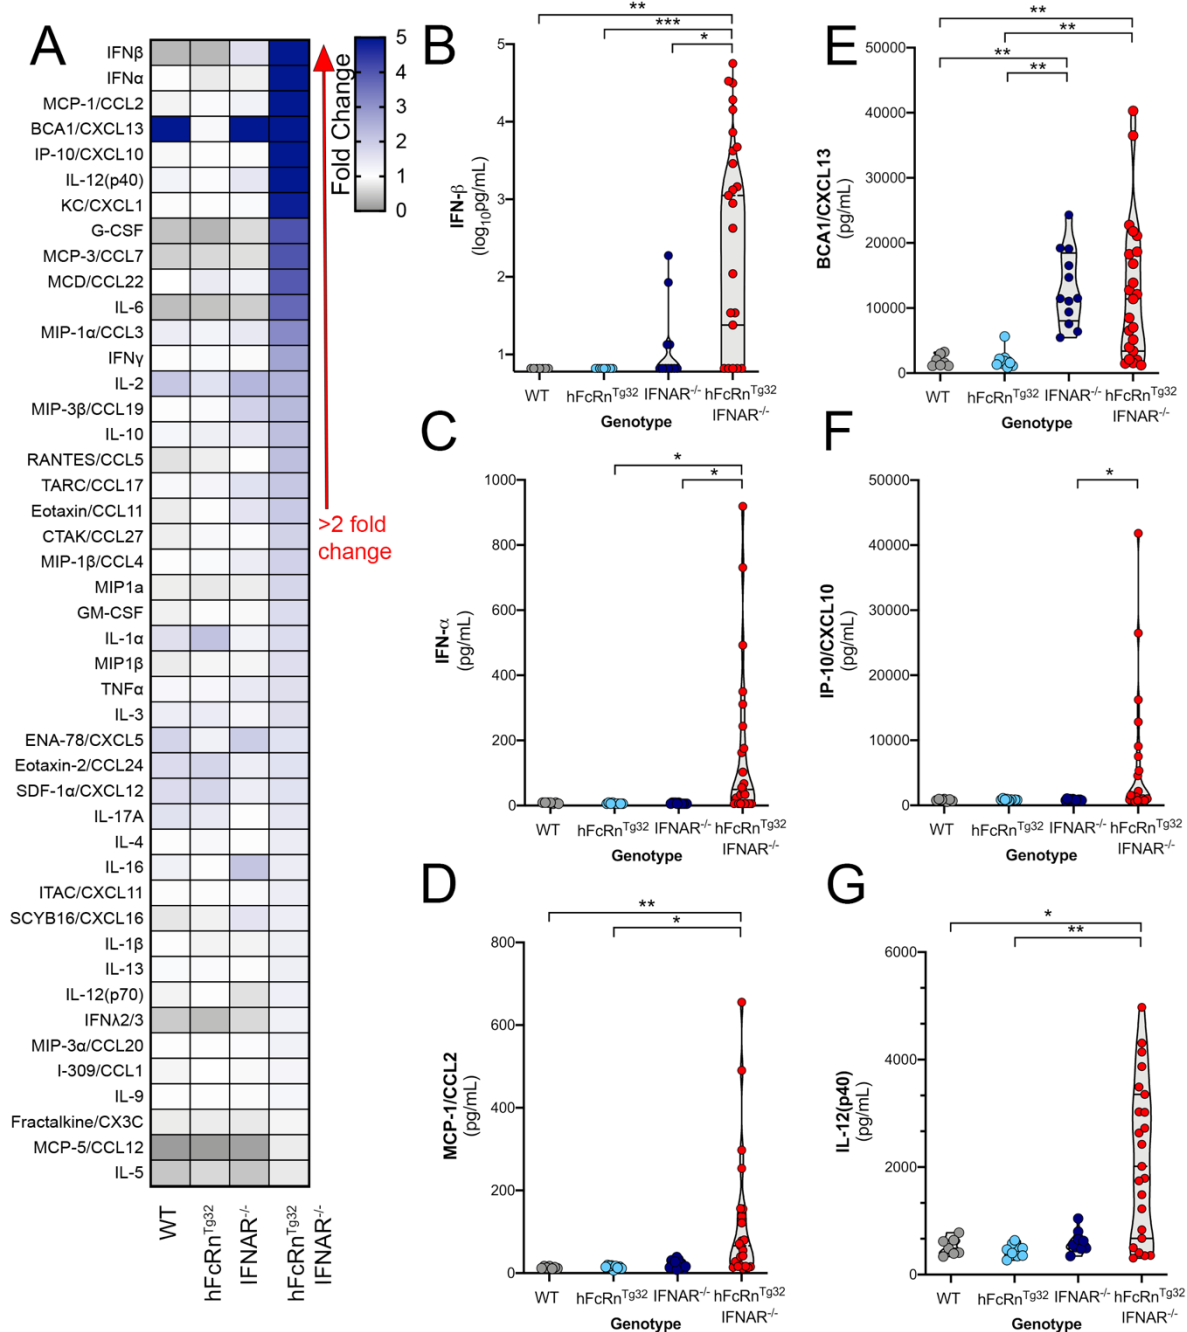

582 **Figure 3. hFcRn<sup>Tg32</sup>-IFNAR<sup>-/-</sup> animals induce a robust immune response to E11 infection.**  
 583 C57/BL6 (WT, gray), hFcRn<sup>Tg32</sup> (light blue), IFNAR<sup>-/-</sup> (dark blue), and hFcRn<sup>Tg32</sup>-IFNAR<sup>-/-</sup> (red)  
 584 animals were IP inoculated with 10<sup>4</sup> PFU of E11 and sacrificed 72 hours post inoculation.  
 585 Luminex-based multianalyte profiling of 45 cytokines was then performed from whole blood. **(A)**  
 586 Heatmap demonstrating the induction (shown as fold-change from uninfected control) in E11-  
 587 infected mice of the indicated genotype. Blue denotes significantly increased cytokines in  
 588 comparison to untreated. Grey or white denote little to no changes (scale at top right). The red  
 589 arrow demonstrates cytokines with greater than 2-fold upregulation observed in the average of  
 590

591 separate experiments. Luminex assays were performed in duplicate. **(B-G)** IFN- $\beta$  (B), IFN- $\alpha$  (C),  
592 MCL-1/CCL2 (D), BCA1/CXCL13 (E), IP-10/CXCL10, and IL12(p40) cytokine levels in the blood  
593 of E11 infected C57Bl/6 (WT, gray), hFcRn<sup>Tg32</sup> (light blue), IFNAR<sup>-/-</sup> (dark blue), and hFcRn<sup>Tg32</sup>-  
594 IFNAR<sup>-/-</sup> (red) animals. Symbols represent individual mice. Significance was determined with a  
595 Kruskal-Wallis test with a Dunn's test for multiple comparisons (\*p<0.05, \*\*p<0.005, \*\*\*p<0.0005).



596 **Figure 4.**

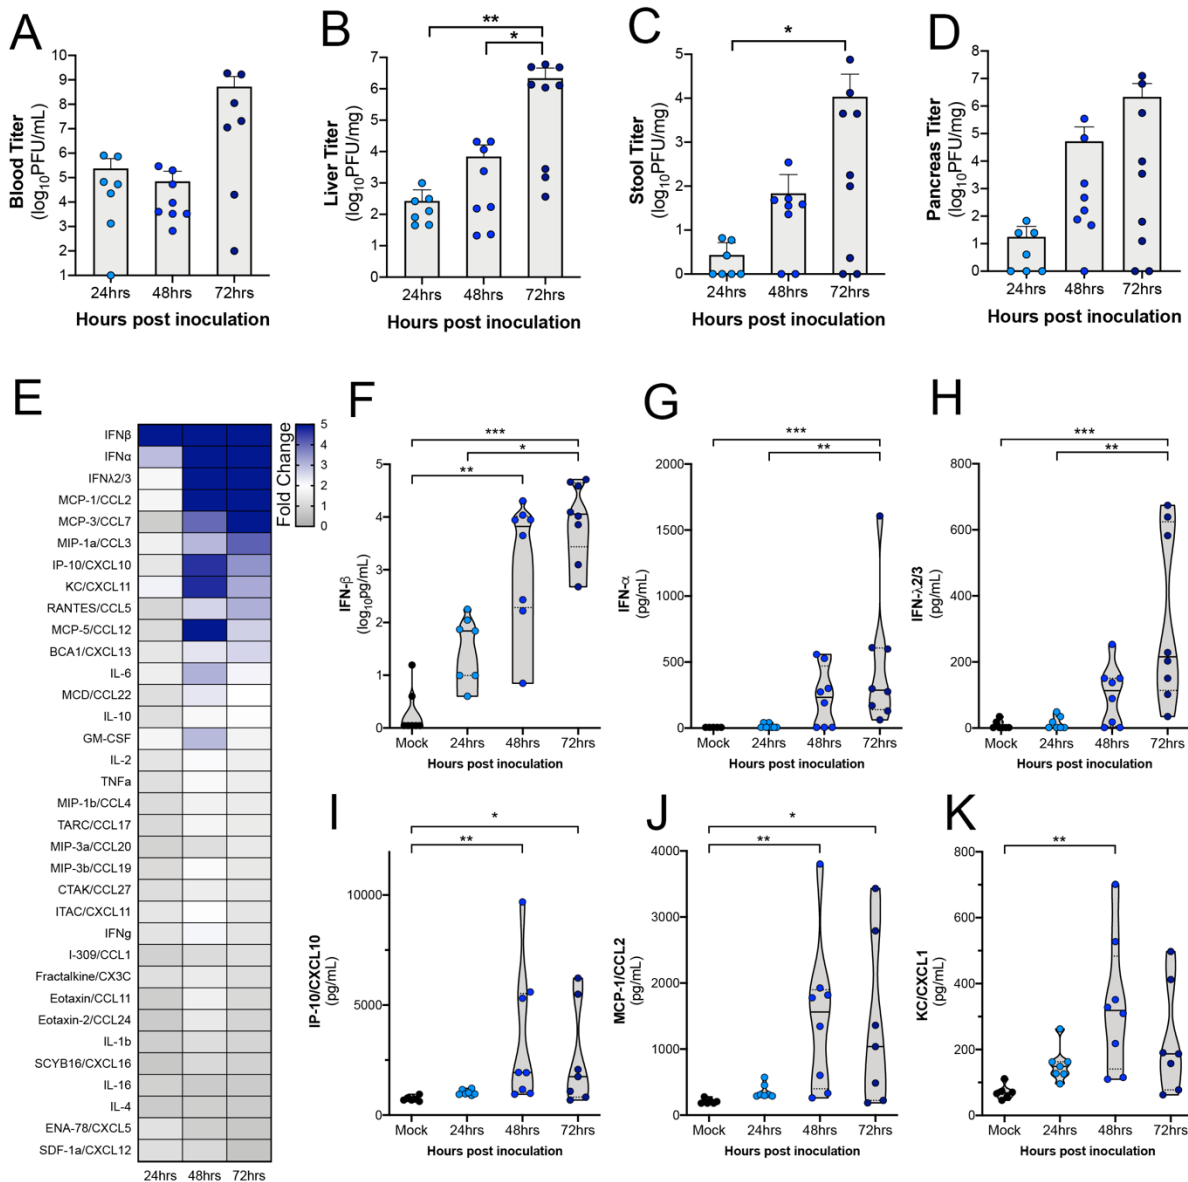

597  
 598 **Figure 4. Cytokine levels increase with viremia in hFcRn<sup>Tg32</sup>-IFNAR<sup>-/-</sup> animals.** hFcRn<sup>Tg32</sup>-  
 599 IFNAR<sup>-/-</sup> animals IP inoculated with 10<sup>4</sup> PFU of E11 were sacrificed at 24 (light blue) 48 (blue), or  
 600 72 (navy) hours post inoculation. **(A)** Viral titers in the blood ( $\log_{10}$ PFU/mL) of adult animals (24hpi – 7,  
 601 48hpi – 8, 72hpi – 9 animals) are shown as mean  $\pm$  standard deviation bars) and individual  
 602 animals (points). **(B-D)** Viral titers in the liver (B), stool (C), and pancreas (D), ( $\log_{10}$ PFU/mg) from  
 603 adult mice are shown as mean  $\pm$  standard deviation bars and individual animals (points). **(E)** Heat  
 604 map demonstrating the level of protein induction by Luminex-based assays shown as the fold change  
 605 of from the average pg/mL of the uninfected animals to each individual animal  
 606 concentration per protein then averaged within each timepoint. Proteins are sorted from largest  
 607 fold change (blue) from uninfected to smallest fold change (gray) in 72hpi animals. **(F-K)** IFN- $\beta$   
 608 (F), IFN- $\alpha$  (G), IFN $\lambda$ 2/3 (H), IP-10/CXCL10 (I), MCP-1/CCL2 (J), and KC/CXCL1 (K) protein levels  
 609 expressed in the blood of each animal shown by timepoint. Data are shown with significance

610 determined with a Kruskal-Wallis test with a Dunn's test for multiple comparisons (\* $p < 0.05$ ,  
611 \*\* $p < 0.005$ , \*\*\* $p < 0.0005$ , \*\*\*\* $p < 0.0001$ ).  
612  
613  
614

615 **Figure 5.**

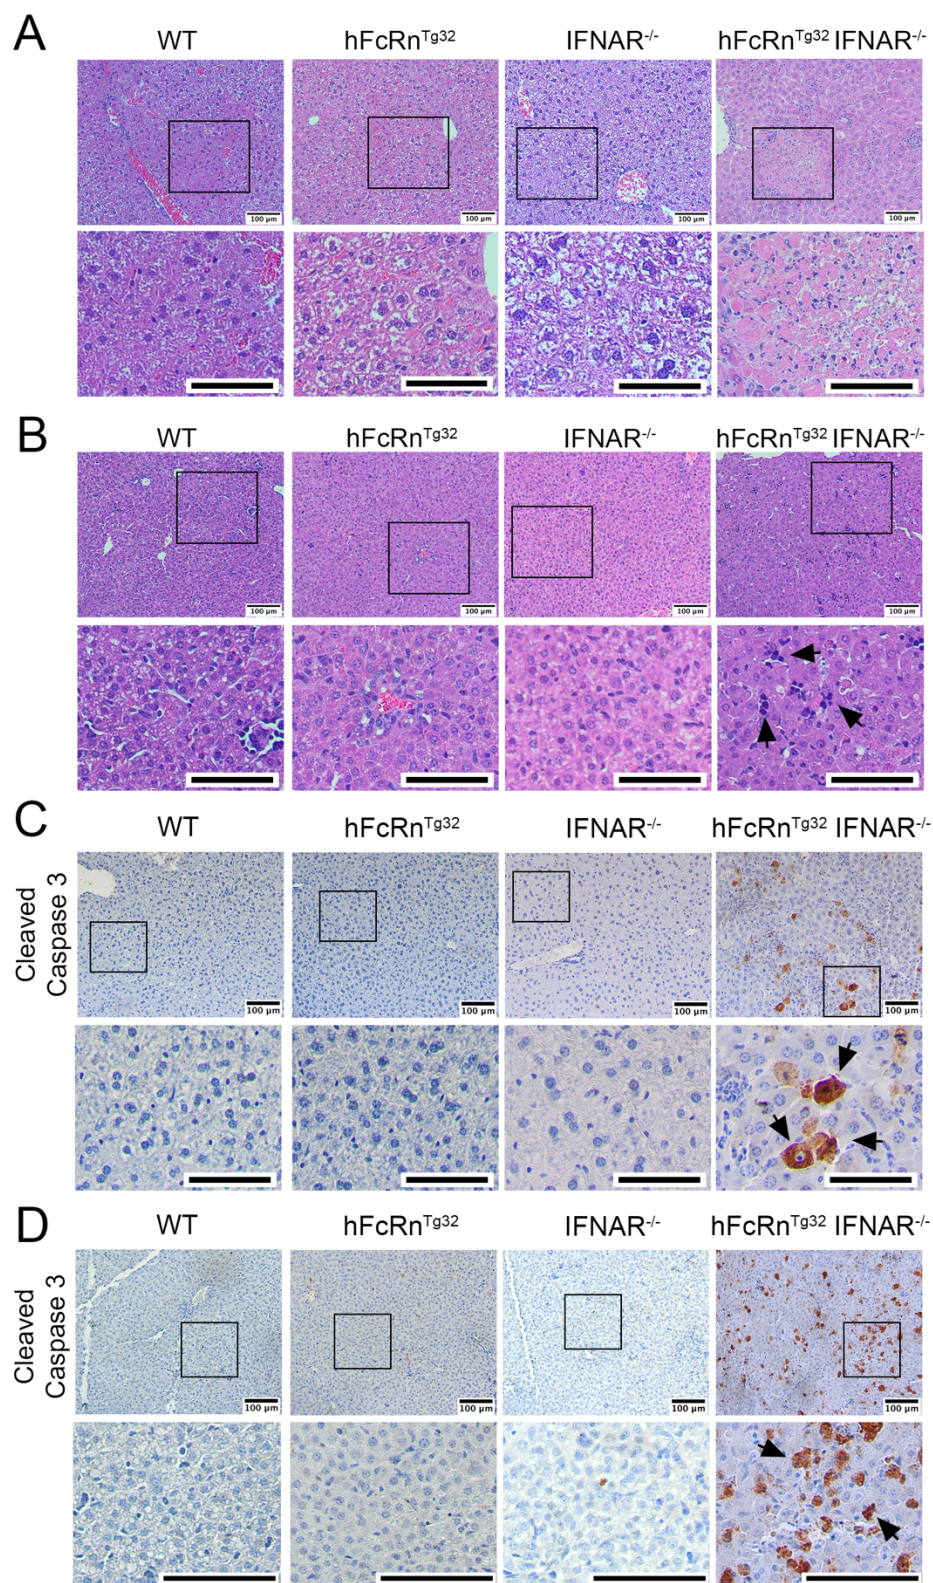

616  
617 **Figure 5. E11 infection induces histopathologic changes and cell death.** C57Bl/6 (WT),  
618 hFcRn<sup>Tg32</sup>, IFNAR<sup>-/-</sup>, and hFcRn<sup>Tg32</sup>-IFNAR<sup>-/-</sup> adult (A & C) or suckling mice (B & D) were IP

619 inoculated with  $10^4$  E11 and sacrificed 72 hours post inoculation. **(A & B)** H&E staining of the  
620 livers in adult (A) or suckling (B) mice. **(C & D)** Immunohistochemistry using an antibody  
621 recognizing the cleaved form of caspase 3 from the livers of a representative animal of each  
622 genotype as indicated. Adult (C) and suckling mice (D). Black arrows denote positive staining.  
623 Scale bars (100 $\mu$ m) are shown at bottom right.  
624  
625

626 **Figure 6**

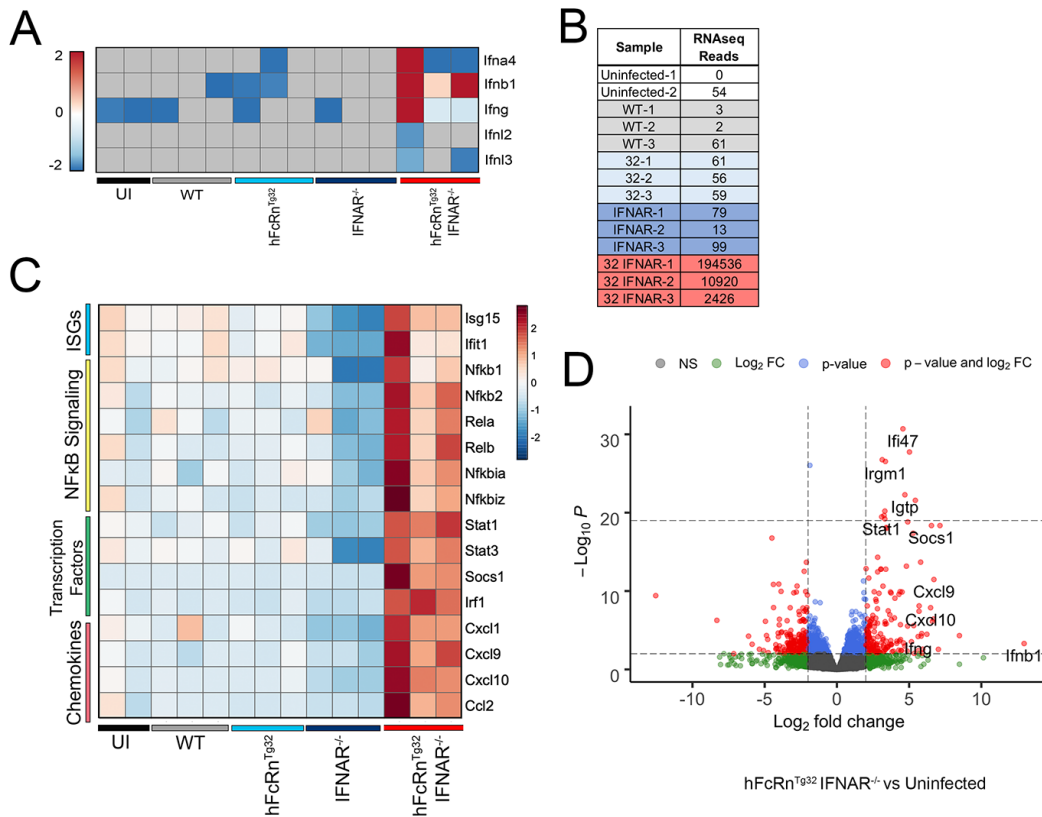

627  
 628 **Figure 6. Transcriptional profiling from the livers of E11 infected hFcRn<sup>Tg32</sup>-IFNAR<sup>-/-</sup>**  
 629 **animals reveals induction of a proinflammatory immune response to infection.** RNAseq-  
 630 based transcriptional profiling from RNA isolated from the livers of E11 infected C57Bl/6 (WT),  
 631 hFcRn<sup>Tg32</sup>, IFNAR<sup>-/-</sup> or hFcRn<sup>Tg32</sup>-IFNAR<sup>-/-</sup> animals (3 animals each), or uninfected controls (2  
 632 animals) was performed. **(A)** Heatmap of log<sub>2</sub>RPKM values for type I (Ifna4, Ifnb1), II (Ifng), and  
 633 III (Ifnl2, Ifnl3) IFNs in the livers of the indicated genotypes 72hpi. Scale shown at left. **(B)** RPKM  
 634 values mapped to the E11 genomic sequence in each genotype. Individual animals are shown.  
 635 **(C)** Heatmap based on log<sub>2</sub>RPKM values of select proinflammatory cytokines in the livers of  
 636 following E11 infection of the indicated genotypes, or uninfected controls. Scale is shown at right.  
 637 In (A) and (C), red indicates higher expression and blue indicates lower expression. Grey denotes  
 638 no reads detected. **(D)** Volcano plot of differentially regulated genes in hFcRn<sup>Tg32</sup>-IFNAR<sup>-/-</sup> adult  
 639 animals compared to uninfected animals. Red indicates genes with a statistically significant  
 640 upregulation or downregulation of > or < log<sub>2</sub> fold-change of 2 and p<0.05.  
 641

642 **Figure 7**

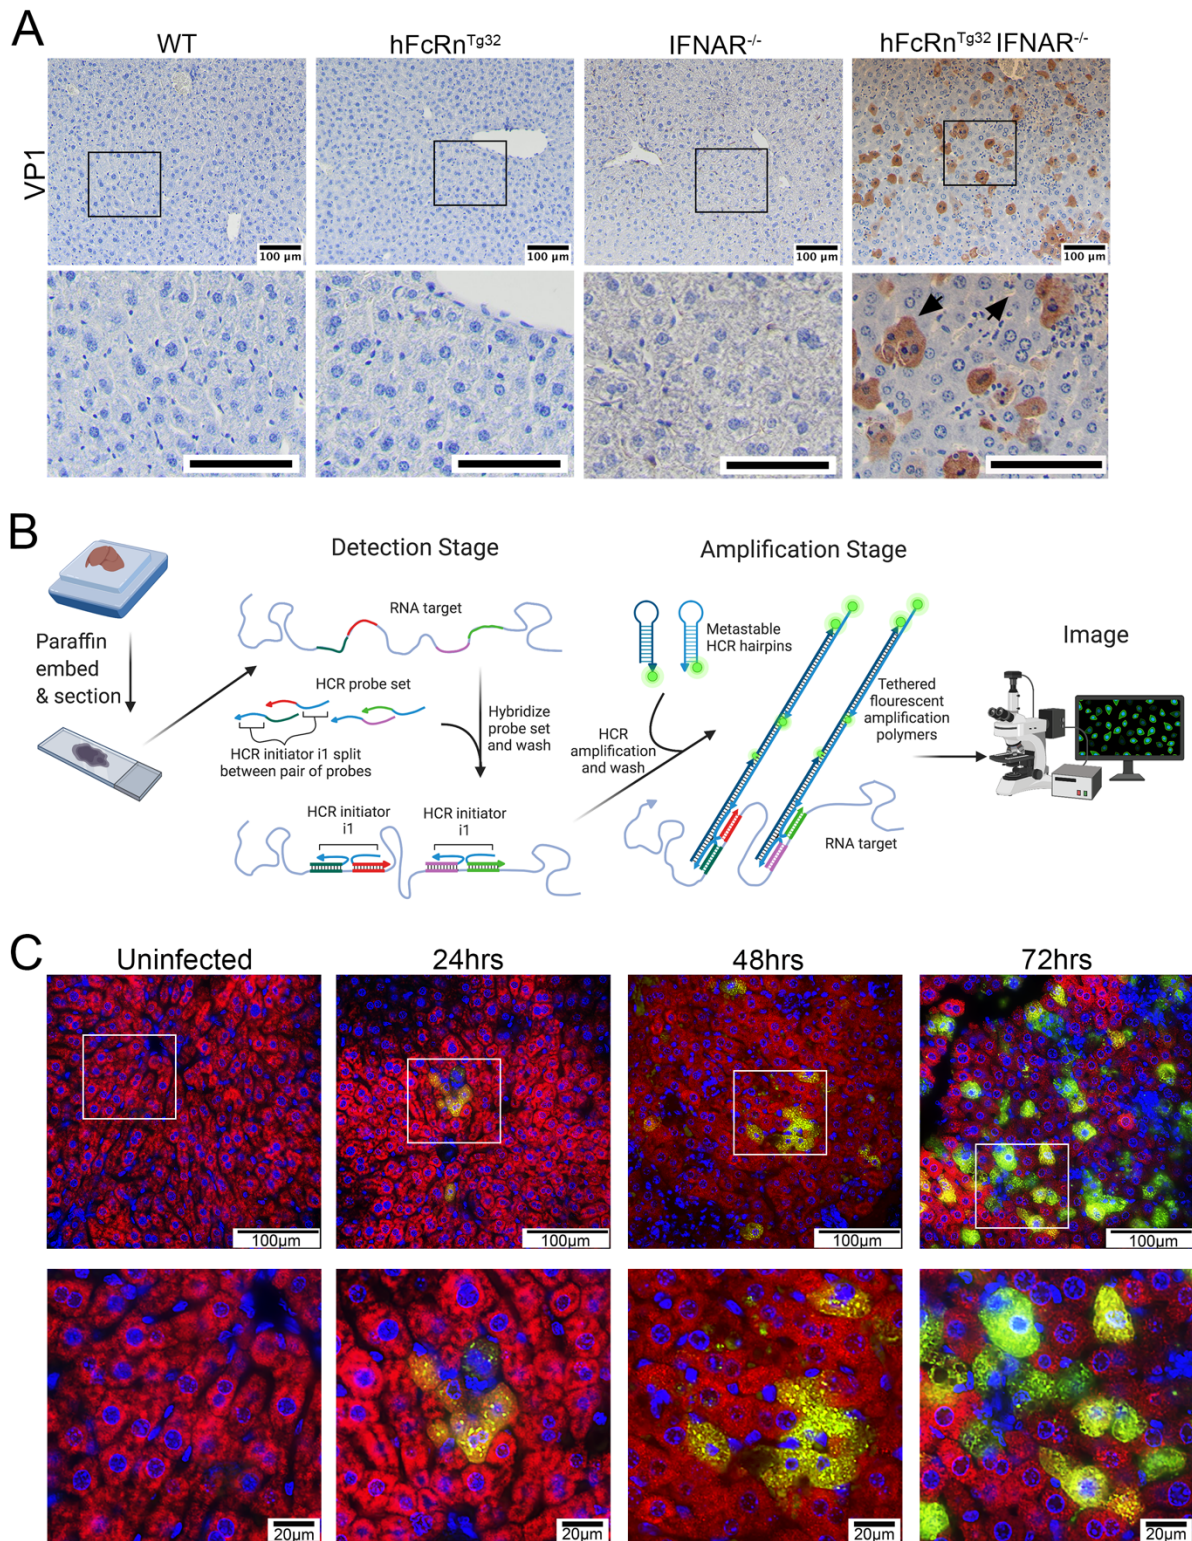

643

644

645

**Figure 7. Hepatocytes are the primary site of E11 replication in the liver. (A)** C57Bl/6 (WT), hFcRn<sup>Tg32</sup>, IFNAR<sup>-/-</sup>, or hFcRn<sup>Tg32</sup> IFNAR<sup>-/-</sup> adult animals were IP inoculated with 10<sup>4</sup> PFU of E11

646 and sacrificed 72 hours post inoculation. Immunohistochemistry for E11 using an antibody  
647 recognizing the VP1 capsid protein from the liver of a representative adult animal of each  
648 genotype is shown. Black arrows denote positive staining. **(B)** Schematic of the hybridization  
649 chain reaction (HCR) protocol used adapted from the Molecular Instruments HCR v3.0 protocol  
650 and created with BioRender.com. **(C)** HCR of hFcRn<sup>Tg32</sup>-IFNAR<sup>-/-</sup> adult animals at the indicated  
651 dpi using probes against the E11 genome (green) and albumin (red). White boxes denote areas  
652 zoomed at bottom. Scale bars shown at bottom right (100µm at top and 20µm at bottom). Three  
653 unique fields were captured and colocalization between vRNA and albumin quantified, as  
654 indicated in the text.  
655

Table 1

Probes used to detect echovirus RNA

| Probe Pair |                                                      |                                                    |
|------------|------------------------------------------------------|----------------------------------------------------|
| B4P1       | CCTCAACCTACCTCCAAC<br>AATTTGTGTTGATACTTGCGCTCCCAT    | TCAAGCCGGTTTCATGCGCACCGG<br>TATTCTCACCATATTCGCTTC  |
| B4P2       | CCTCAACCTACCTCCAACAAC TG<br>CCTATTTGCCGAGTTGGATGC    | TGAACTTACCAGGGTCTTGTGAAAA<br>ATTCTCACCATATTCGCTTC  |
| B4P3       | CCTCAACCTACCTCCAACAATGTC<br>ACTGTACCCACACTCTTCAGC    | AGTTACCTAGTGTTATGGATCGCA<br>CATTCTCACCATATTCGCTTC  |
| B4P4       | CCTCAACCTACCTCCAACAAT GGC<br>CTCATTGTCTTTCAGGTA CT C | CAGGGTGGGTTGGTTGATCTTCAG<br>CATTCTCACCATATTCGCTTC  |
| B4P5       | CCTCAACCTACCTCCAACAAC<br>CGGGAATTTCCACCACCACCCGGG    | CGAAGAGCCCCATATCTTTTAGGG<br>CATTCTCACCATATT CGCTTC |
| B4P6       | CCTCAACCTACCTCCAACAACCTG<br>ATGGAATTTAGATGCATTACA    | CCGGTACACAGACCACTAGCAAGC<br>AATTCTCACCATATTCGCTTC  |
| B4P7       | CCTCAACCTACCTCCAACAAA<br>GAATTTCTTAGCGGTCTCCCCCTC    | TGTTGGTCCCATTTGTGCTGGTAG<br>AATTCTCACCATATTCGCTTC  |
| B4P8       | CCTCAACCTACCTCCAACAAAATT<br>TATCCACTGATGTGGGTATAT    | CGATGGTGGCGCAGTTATTGGTGC<br>GATTCTCACCATATTCGCTTC  |
| B4P9       | CCTCAACCTACCTCCAACAAGTAC<br>AAAGGGAATAATCATTAGTGT    | TGGATGAATCTGAAGAATAGTCTA<br>AATTCTCACCATATTCGCTTC  |
| B4P10      | CCTCAACCTACCTCCAACAAATCC<br>TTGCAATGAGGTTGAGAGCCT    | TGCTACCCGGTGTATTCATGACAG<br>GATTCTCACCATATTCGCTTC  |

Table 2

Probes used to detect mouse albumin RNA

| Probe Pair |                                                     |                                                    |
|------------|-----------------------------------------------------|----------------------------------------------------|
| B1P1       | GAGGAGGGCAGCAAACGG AA<br>GAGGAGGAGGAGAAAGGTTACCCAC  | CCTGGAAAAAGCAGAGCCGGAGACG<br>TA GAAGAGTCTTCCTTTACG |
| B1P2       | GAGGAGGGCAGCAAACGG AA<br>TGCTCATCGTATGAGCATTCTGGA   | TCTGTTACTTCCTGCACTAATTTGG<br>TA GAAGAGTCTTCCTTTACG |
| B1P3       | GAGGAGGGCAGCAAACGG AA<br>TCACGGAGGTTTGGAAATGGCACACA | CAGCAGTCAGCCAGTTCACCATAGT<br>TA GAAGAGTCTTCCTTTACG |
| B1P4       | GAGGAGGGCAGCAAACGG AA<br>GGCATAGAAATAAGGATGTCTTCTG  | CTGCTCAGCATAGTAAAGAAGTTCT<br>TA GAAGAGTCTTCCTTTACG |
| B1P5       | GAGGAGGGCAGCAAACGG AA<br>CACTCCTTGTTGACTTTGGTCAGGT  | GCGCATTCCAGCAGGTCACCATGGC<br>TA GAAGAGTCTTCCTTTACG |
| B1P6       | GAGGAGGGCAGCAAACGG AA<br>CTTGACACTTCCTGGTCCTCAACA   | GAAGACATCCTTGGCCTCAGCATAG<br>TA GAAGAGTCTTCCTTTACG |
| B1P7       | GAGGAGGGCAGCAAACGG AA<br>GCTCTTCTACAAGAGGCTGAAATTC  | CACAGTTGGTTTTGACCAAGTTCTT<br>TA GAAGAGTCTTCCTTTACG |
| B1P8       | GAGGAGGGCAGCAAACGG AA<br>AGACAGATAGTCTTCACACAAGGC   | CAGCAGACACACACGGTTCAGGATT<br>TA GAAGAGTCTTCCTTTACG |
| B1P9       | GAGGAGGGCAGCAAACGG AA<br>TCTCAGCTTTAAACTCTTTGGGGAC  | TGCAGATATCAGAGTGGAAGGTGAA<br>TA GAAGAGTCTTCCTTTACG |



|       |                                                    |                                                  |
|-------|----------------------------------------------------|--------------------------------------------------|
| B1P10 | GAGGAGGGCAGCAAACGG AA<br>GAGAAGGTTGTGGTTGTGATGTGTT | TCATGTCTTTTTTCTCAGGGTAGC<br>TA GAAGAGTCTTCCTTACG |
|-------|----------------------------------------------------|--------------------------------------------------|

Supplemental Figure 1

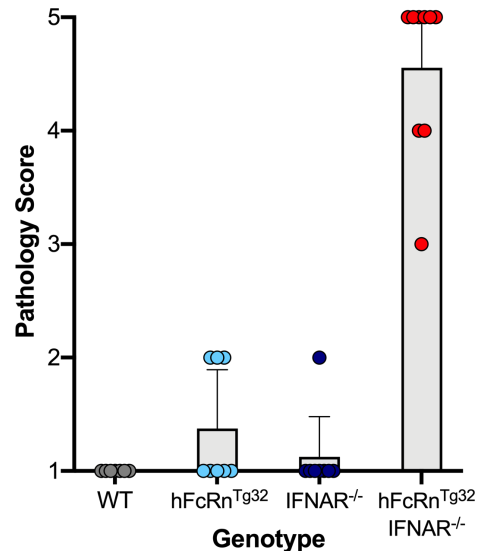

**Supplemental Figure 1.** WT (grey, 7 animals), hFcRn<sup>Tg32</sup> (light blue, 8 animals), IFNAR<sup>-/-</sup> (dark blue, 8 animals), and hFcRn<sup>Tg32</sup>-IFNAR<sup>-/-</sup> (red, 6 animals) adult mice were inoculated with E11 by the IP route and sacrificed 72 hours post inoculation. H&E sections were scored blinded to genotype based on severity of pathology using the following descriptors—1: retention of normal architecture and cord pattern of liver cells, 2: Immune infiltration, 3: spotty/random hepatocytolysis, 4: punctate aggregates of hepatocyte necrosis/death, and 5: confluent areas of hepatocyte necrosis and death.

## Supplemental Figure 2

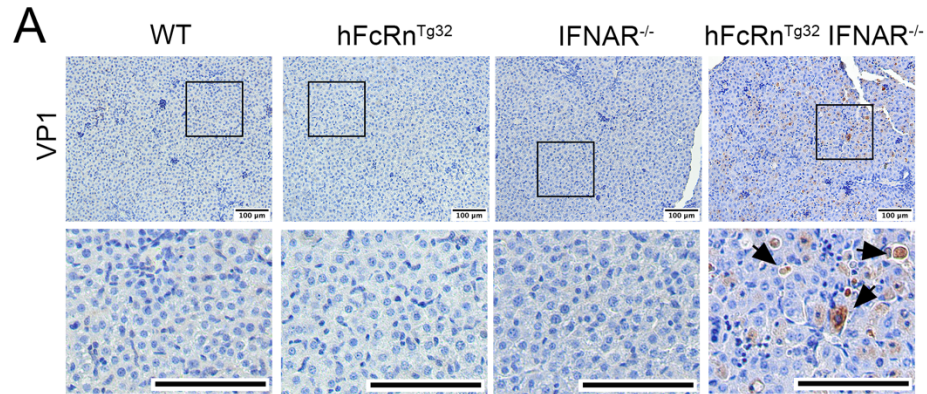

**Supplemental Figure 2.** WT, hFcRn<sup>Tg32</sup>, IFNAR<sup>-/-</sup>, and hFcRn<sup>Tg32</sup>-IFNAR<sup>-/-</sup> suckling mice were inoculated with E11 by the IP route and sacrificed 72 hours post-inoculation. Shown are representative images from immunohistochemistry for E11 using an antibody recognizing the VP1 capsid protein from the livers of a representative animal of each genotype.
